1           **The H-NS regulator plays a role in the stress induced by carbapenemase**  
2                           **expression in *Acinetobacter baumannii***

3           Fanny Huang<sup>1</sup>, Noelle Fitchett<sup>1</sup>, Chelsea Razo-Gutierrez<sup>1</sup>, Casin Le<sup>1</sup>, Grace Ra<sup>1</sup>,  
4           Carolina Lopez<sup>2</sup>, Lisandro J. Gonzalez<sup>2,3</sup>, Rodrigo Sieira<sup>4</sup>, Alejandro J. Vila<sup>2,3</sup>, Robert A.  
5                           Bonomo<sup>5,6,7</sup>, Maria Soledad Ramirez<sup>1\*</sup>.

6           <sup>1</sup>Center for Applied Biotechnology Studies, Department of Biological Science, College of  
7           Natural Sciences and Mathematics, California State University Fullerton, Fullerton,  
8           California, USA, <sup>2</sup>Instituto de Biología Molecular y Celular de Rosario (IBR, CONICET-  
9           UNR), Rosario, Argentina, <sup>3</sup>Área Biofísica, Facultad de Ciencias Bioquímicas y  
10           Farmacéuticas, Universidad Nacional de Rosario, Rosario, Argentina, <sup>4</sup>Fundación  
11           Instituto Leloir – IIBBA CONICET, Buenos Aires, Argentina, <sup>5</sup>Research Service and  
12           GRECC, Louis Stokes Cleveland Department of Veterans Affairs Medical Center,  
13           Cleveland, Ohio, USA, <sup>6</sup>Departments of Medicine, Pharmacology, Molecular Biology  
14           and Microbiology, Biochemistry, Proteomics and Bioinformatics, Case Western Reserve  
15           University School of Medicine, Cleveland, Ohio, USA, <sup>7</sup>CWRU-Cleveland VAMC Center  
16           for Antimicrobial Resistance and Epidemiology (Case VA CARES), Cleveland, Ohio,  
17           USA.

18           **Running Title:** H-NS plays a role in stress response

19           **Keywords:** *Acinetobacter baumannii*, H-NS, stress, carbapenemases

20

21           **\*Corresponding author.**

22           María Soledad Ramírez, PhD.

23           Assistant Professor

24           Dept. Biological Science

25           California State University Fullerton

26           800 N State College Blvd

27           Fullerton, CA 92831

28           e-mail: [msramirez@fullerton.edu](mailto:msramirez@fullerton.edu)

29           Tel: [+1 657-278-4562](tel:+16572784562)

30

31           **Abstract**

32 Disruption of the histone-like nucleoid structuring protein (H-NS) was shown to affect  
33 the ability for Gram-negative bacteria to regulate genes associated with virulence,  
34 persistence, stress response, quorum sensing, biosynthesis pathways and cell  
35 adhesion. Here, we used the expression of metallo- $\beta$ -lactamases (MBLs) known to elicit  
36 envelope stress by the accumulation of toxic species in the periplasm to interrogate the  
37 role of H-NS in *Acinetobacter baumannii*, together with other stressors. Using a  
38 multidrug-resistant *A. baumannii*, we observed that H-NS plays a role in alleviating the  
39 stress triggered by MBL toxic precursors and counteract the effect of DNA-damaging  
40 agents, supporting its role in stress response.

41

## 42 **Importance**

43 Carbapenem-resistant *A. baumannii* (CRAB) is recognized as one of the most  
44 threatening gram-negative bacilli. H-NS is known to play a role in controlling the  
45 transcription of a variety of different genes, including those associated with stress  
46 response, persistence and virulence. In the present work, we uncovered a link between  
47 the role of H-NS in the *A. baumannii* stress response and its relationship with the  
48 envelope stress response and resistance to DNA-damaging agents. Overall, we posit a  
49 new role of H-NS, showing that H-NS serves to endure envelope stress that could also  
50 be a mechanism that alleviates the stress induced by MBL expression in *A. baumannii*.  
51 This could be an evolutionary advantage to further resist the action of carbapenems.

52

53

54

55 *Acinetobacter baumannii* is a nosocomial pathogen frequently resistant to  
56 multiple drugs and causes a wide variety of infections with associated high mortality  
57 rates. Carbapenem-resistant *A. baumannii* (CRAB) have frequently been reported  
58 among hospital bailouts (1). In addition, CDC's 2019 Antibiotic Resistance Threats  
59 Report moved CRAB into the urgent threats category (2). The expression of  
60 carbapenemases is critical for this organism to thrive under the selection pressure of  
61 these antibiotics in clinical environments. Instead, under permissive conditions (absence  
62 of antibiotics), the expression of some metal-dependent carbapenemases compromises  
63 the fitness of *A. baumannii*, triggering different responses associated to envelope stress  
64 (8). Despite the increased knowledge gained in recent years regarding *A. baumannii*'s  
65 epidemiology, pathogenicity and antimicrobial resistance (3, 4), how this pathogen  
66 responds to stressful environments is still not completely understood.

67 H-NS is a histone-like nucleoid structuring protein that serves as a global  
68 repressor, and has been shown to be involved in stress response in Gram-negative  
69 bacilli, such as *Vibrio cholerae* and *Escherichia coli* (5, 6). H-NS is known to protect the  
70 bacteria from environmental stresses through regulation of transcription and translation  
71 of virulence genes, quorum osmolarity, stress etc. (7, 8).

72 In *A. baumannii* the disruption of H-NS was found to affect the ability of this  
73 bacterium to regulate genes associated with persistence and virulence (9). However,  
74 the role of H-NS in stress response in *A. baumannii* has not been addressed yet. Here,  
75 we aimed to test the role of H-NS in *A. baumannii* stress response and how this could  
76 be linked with the success of multi-drug resistance *A. baumannii* in the hospital  
77 environment. Recent studies have shown that the production of certain MBL  
78 carbapenemases exert an envelope stress in an *A. baumannii* laboratory strain,  
79 resulting in growth defects (10). In this way, to study the role of H-NS in overcoming  
80 different kinds of stress, we utilized and evaluated the expression of three MBLs: NDM-  
81 1, VIM-2 and SPM-1, as stressors in the periplasmic space of AB5075 strain, and  
82 different known DNA-damaging agents.

83 Lopez *et al.* have shown that the inefficient processing upon translocation of non-  
84 frequent carbapenemases in *A. baumannii*, such as VIM-2 and SPM-1, compromises  
85 the bacterial fitness by triggering an envelope stress (10). Instead, expression of NDM-1

86 (a common resistance determinant in *A. baumannii*) is coupled to efficient processing,  
87 without causing any stress (10). In this way, this system represents a unique model to  
88 test envelope stress response since this stress can be regulated by varying the  
89 expression levels of MBLs, which directly affect the accumulation of toxic species in the  
90 periplasmic space.

91 To study the possible role of H-NS in envelope stress relief to overcome the  
92 expression of NDM-1, VIM-2 and SPM-1, growth curves of AB5075 and AB5075  $\Delta$ -hns  
93 expressing the different MBLs were performed. The mutant strain did not show impaired  
94 growth neither with the empty vector nor when expressing NDM-1 compared to the wild  
95 type strain (Fig. 1A-C). In line with previous studies, the expression of VIM-2 or SPM-1  
96 affected the growth of AB5075. This effect was more pronounced in a  $\Delta$ -hns  
97 background, indicating that the lack of H-NS impairs the growth of strains expressing  
98 SPM-1 and VIM-2 (Fig. 1B-C).

99 Growth curves were unaltered when MBL expression was not induced (Fig. 1A-  
100 B) suggesting that H-NS plays a role in managing the accumulation of toxic precursor  
101 forms of SPM-1 and VIM-2. Our results also showed that when SPM-1 and VIM-2 were  
102 produced in relatively low amounts (0 and 10  $\mu$ M IPTG), *A. baumannii* is able to  
103 withstand much of the impact on growth (Fig. 1A-D). The effect of fitness cost upon  
104 induction of SPM-1 and VIM-2 became evident at 20  $\mu$ M IPTG (Fig. 1E-F).

105 We next sought to evaluate whether H-NS is also involved in the ability of *A.*  
106 *baumannii* to overcome other stressors, such as DNA-damaging agents MC and  
107 levofloxacin. AB5075  $\Delta$ -hns exhibited a decreased viability when exposed to MC (Fig.  
108 2A). Also, the bacterial growth curve in the presence of levofloxacin showed an  
109 impaired growth for AB5075  $\Delta$ -hns (Fig. 2B). Overall, these data show that H-NS is  
110 involved in different *A. baumannii* stress responses.

111 The stress response in *A. baumannii* is linked to limitation of essential nutrients,  
112 antibiotic treatment, oxidative damage, exposure to antiseptics, among others (11).  
113 When exposed to stress environments such as pleural fluid, *A. baumannii* can control  
114 the expression of different genes to overcome the stress and persist under the stressors  
115 signals (12).

116 In some gram-negative bacilli the role of H-NS in stress response has been well-  
117 characterized, e.g. in *V. cholerae* the deletion of *hns* has been shown to induce an  
118 envelope stress response causing an increasing expression of *rpoE*, and the regulators  
119 *rseA*, *rseB*, *rseC*, suggesting its role in cell envelope biogenesis (5). However, data on  
120 *A. baumannii* are scarce (9) (13).

121 Recent studies showed that periplasmic stress generated by production of toxic  
122 MBLs can be alleviated by an increase in the production of outer membrane vesicles  
123 (hypervesiculation phenotype) enclosing non-host-adapted MBLs. Along with  
124 membrane vesiculation, the activation of periplasmic proteases also acts to relieve the  
125 accumulation of toxic MBLs in the periplasm in non-frequent hosts (10). Here, we show  
126 a different strategy, involving the H-NS regulator, used by the highly resistant and  
127 hypervirulent AB5075 to cope with the expression of MBLs. We observed that AB5075  
128 express NDM-1 without growth defects. Instead, the expression of VIM-2 and SPM-1  
129 compromised *A. baumannii* survival, triggering a stress response H-NS-dependent.

130 We also observed that H-NS is involved in stress response, not only alleviating  
131 the stress imposed by expression of VIM-2 and SPM-1, but also by DNA damaging  
132 agents. The expression of SPM-1 in the mutant H-NS strain caused a more drastic  
133 decrease in growth compared to VIM-2.

134 Collectively, our observations suggest that H-NS serves to overcome envelope  
135 stress and could also be a possible mechanism that may allow to alleviate the stress  
136 induced by VIM-2 and SPM-1 in *A. baumannii*, further increasing its repertoire to resist  
137 the action of carbapenems.

138

### 139 ***Bacterial strains and plasmids***

140 AB5075 and AB5075  $\Delta$ -*hns* were used in the present study. For expressing the different  
141 *bla* genes (*bla*<sub>VIM-2</sub>, *bla*<sub>SPM-1</sub> and *bla*<sub>NDM-1</sub>) in *A. baumannii*, plasmids constructions of the  
142 MBL variants already containing *bla*<sub>VIM-2</sub>, *bla*<sub>SPM-1</sub> and *bla*<sub>NDM-1</sub>, as well as the empty  
143 vector pMBLe-OA (10) were used as backbone to include the apramycin (ArK<sup>R</sup>) to  
144 generate the plasmids pMBLe-OA-ArK, pMBLe-VIM-2-ArK, pMBLe-SPM-1-ArK, and  
145 pMBLe-NDM-1-ArK to be used in the MDR strains AB5075 and AB5075  $\Delta$ -*hns*. MBL  
146 expression was induced with low concentrations of IPTG (10 and 20  $\mu$ M), as indicated.

## 147 **Electroporation**

148 Electro-competent *A. baumannii* AB5075 and AB5075  $\Delta$ -*hns* cells were prepared and  
149 mixed with 25 ng of plasmid DNA followed by electroporation with a Bio-Rad Gene  
150 Pulser instrument at 2.5 kV, 200  $\Omega$ , 25  $\mu$ F. The electroporated cells were placed in  
151 recovery with 1ml of LB broth for 2 hours at 37 °C in a shaking incubator followed by  
152 culturing overnight at 37°C on LB agar containing 15  $\mu$ g/ml apramycin. At least 10  
153 colonies were picked to confirm the presence of the different plasmids. To confirm their  
154 presence, plasmid extraction followed by gel electrophoresis analysis and PCR reaction  
155 using the corresponding primers to amplify either *bla*<sub>VIM-2</sub>, *bla*<sub>SPM-1</sub> and *bla*<sub>NDM-1</sub>, and ArK  
156 (apramycin resistant gene) were performed.

## 157 **Growth curves**

158 Growth curves were conducted on 96-well plates in triplicate with strains AB5075, and  
159 AB5075  $\Delta$ -*hns* with (pMBLe-OA-ArK, pMBLe-VIM-2-ArK, pMBLe-SPM-1-ArK, and  
160 pMBLe-NDM-2-ArK ) in LB plus 0, 10 or 20  $\mu$ M IPTG. Overnight cultures were  
161 subcultured 1:50 in LB incubated for 15 hours at 37°C with medium shaking. Growth  
162 was measured at an OD<sub>600</sub> every 20 minutes using a Synergy 2 multi-mode plate reader  
163 (BioTek, Winooski, VT, USA) and Gen5 microplate reader software (BioTek).

## 164 **DNA-damaging agents susceptibility assays**

165 AB5075, and AB5075  $\Delta$ -*hns* cells were exposed to 0.2  $\mu$ g/ml mitomycin C (MC) and cell  
166 count was performed to measure cell-killing as previously described (12). Assays were  
167 performed in triplicate, with at least three technical replicates per biological replicate. In  
168 addition, growth curve of strains AB5075, and AB5075  $\Delta$ -*hns* exposed to 0 or 8ug/ml of  
169 levofloxacin (sub-inhibitory concentration) were performed as described above  
170 measuring bacterial growth every 20 minutes using a Synergy 2 multi-mode plate  
171 reader (BioTek, Winooski, VT, USA) and Gen5 microplate reader software (BioTek).

172

173

174 **Funding:** The authors' work was supported by NIH SC3GM125556 to MSR,  
175 R01AI100560 to RAB and AJV, R01AI063517, R01AI072219 to RAB. This study was  
176 supported in part by funds and/or facilities provided by the Cleveland Department of

177 Veterans Affairs, Award Number 1I01BX001974 to RAB from the Biomedical Laboratory  
178 Research & Development Service of the VA Office of Research and Development and  
179 the Geriatric Research Education and Clinical Center VISN 10 to RAB. The content is  
180 solely the responsibility of the authors and does not necessarily represent the official  
181 views of the National Institutes of Health or the Department of Veterans Affairs. CL is  
182 recipient of a postdoctoral fellowship from CONICET. A.J.V., R.S., and L.J.G. are staff  
183 members from CONICET.

184

185 **Transparency declarations.** None to declare

186

## 187 REFERENCES

- 188 1. Rodriguez CH, Nastro M, Famiglietti A. 2018. Carbapenemases in *Acinetobacter*  
189 *baumannii*. Review of their dissemination in Latin America. *Rev Argent Microbiol*  
190 50:327-333.
- 191 2. CDC. 2019. Antibiotic Resistance Threats in the United States. Atlanta, GA: US  
192 Department of Health and Human Services, CDC; 2019.
- 193 3. CDC. 2019. Antibiotic resistance threats in the United States. Centers for  
194 Disease Control, Atlanta, GA.
- 195 4. Isler B, Doi Y, Bonomo RA, Paterson DL. 2019. New treatment options against  
196 carbapenem-resistant *Acinetobacter baumannii* infections. *Antimicrob Agents*  
197 *Chemother* 63.
- 198 5. Wang H, Ayala JC, Benitez JA, Silva AJ. 2015. RNA-seq analysis identifies new  
199 genes regulated by the histone-like nucleoid structuring protein (H-NS) affecting  
200 *Vibrio cholerae* virulence, stress response and chemotaxis. *PLoS One*  
201 10:e0118295.
- 202 6. Dorman CJ. 2014. H-NS-like nucleoid-associated proteins, mobile genetic  
203 elements and horizontal gene transfer in bacteria. *Plasmid* 75:1-11.
- 204 7. Hurtado-Escobar GA, Grepinet O, Raymond P, Abed N, Velge P, Virlogeux-  
205 Payant I. 2019. H-NS is the major repressor of *Salmonella Typhimurium* Pef  
206 fimbriae expression. *Virulence* 10:849-867.
- 207 8. Ayala JC, Silva AJ, Benitez JA. 2017. H-NS: an overarching regulator of the  
208 *Vibrio cholerae* life cycle. *Res Microbiol* 168:16-25.
- 209 9. Eijkelkamp BA, Stroehler UH, Hassan KA, Elbourne LD, Paulsen IT, Brown MH.  
210 2013. H-NS plays a role in expression of *Acinetobacter baumannii* virulence  
211 features. *Infect Immun* 81:2574-83.
- 212 10. Lopez C, Ayala JA, Bonomo RA, Gonzalez LJ, Vila AJ. 2019. Protein  
213 determinants of dissemination and host specificity of metallo-beta-lactamases.  
214 *Nat Commun* 10:3617.
- 215 11. Fiester SE, Actis LA. 2013. Stress responses in the opportunistic pathogen  
216 *Acinetobacter baumannii*. *Future Microbiol* 8:353-65.
- 217 12. Martinez J, Fernandez JS, Liu C, Hoard A, Mendoza A, Nakanouchi J, Rodman  
218 N, Courville R, Tuttobene MR, Lopez C, Gonzalez LJ, Shahrestani P, Papp-

219 Wallace KM, Vila AJ, Tolmasky ME, Bonomo RA, Sieira R, Ramirez MS. 2019.  
220 Human pleural fluid triggers global changes in the transcriptional landscape of  
221 *Acinetobacter baumannii* as an adaptive response to stress. Sci Rep 9:17251.  
222 13. Deveson Lucas D, Crane B, Wright A, Han ML, Moffatt J, Bulach D, Gladman SL,  
223 Powell D, Aranda J, Seemann T, Machado D, Pacheco T, Marques T, Viveiros  
224 M, Nation R, Li J, Harper M, Boyce JD. 2018. Emergence of High-Level Colistin  
225 Resistance in an *Acinetobacter baumannii* Clinical Isolate Mediated by  
226 Inactivation of the Global Regulator H-NS. Antimicrob Agents Chemother 62.

227  
228

## 229 **Figure Legend**

230

231 **Figure 1.** Growth curves of AB5075, and AB5075  $\Delta$ -hns strains, carrying the empty  
232 vector (pMBLe-OA) or expressing *bla*<sub>NDM-1</sub>, *bla*<sub>VIM-2</sub>, or *bla*<sub>SPM-1</sub>. Strains AB5075 and  
233 AB5075  $\Delta$ -hns with (pMBLe-OA-ArK, pMBLe-VIM-2-ArK, pMBLe-SPM-1-ArK, and  
234 pMBLe-NDM-2-ArK) were grown in LB broth plus A-B) 0, C-D) 10, or E-F) 20  $\mu$ M IPTG.  
235 OD600 of the cultures was recorded every 20 minutes for 15 h. The data presented are  
236 the mean from 3 independent experiments.

237

238 **Figure 2.** H-NS role to overcome DNA-damaging A) Mitomycin C (MC) survival assay of  
239 AB5075, and AB5075  $\Delta$ -hns strains. The cells were grown in LB broth overnight and  
240 then serially diluted in agar plates containing MC 0.2  $\mu$ g/ml. The data presented are the  
241 mean +/- SD from 3 independent experiments. B) Growth curves of *A. baumannii* strains  
242 AB5075 and AB5075- $\Delta$ hns in LB broth supplemented with 8  $\mu$ g/mL levofloxacin. Growth  
243 was record (OD600) over 24 hours. Statistical analysis was performed using Mann-  
244 Whitney (n=3, *P*-value <0.05). The data presented are the mean from 3 independent  
245 experiments.



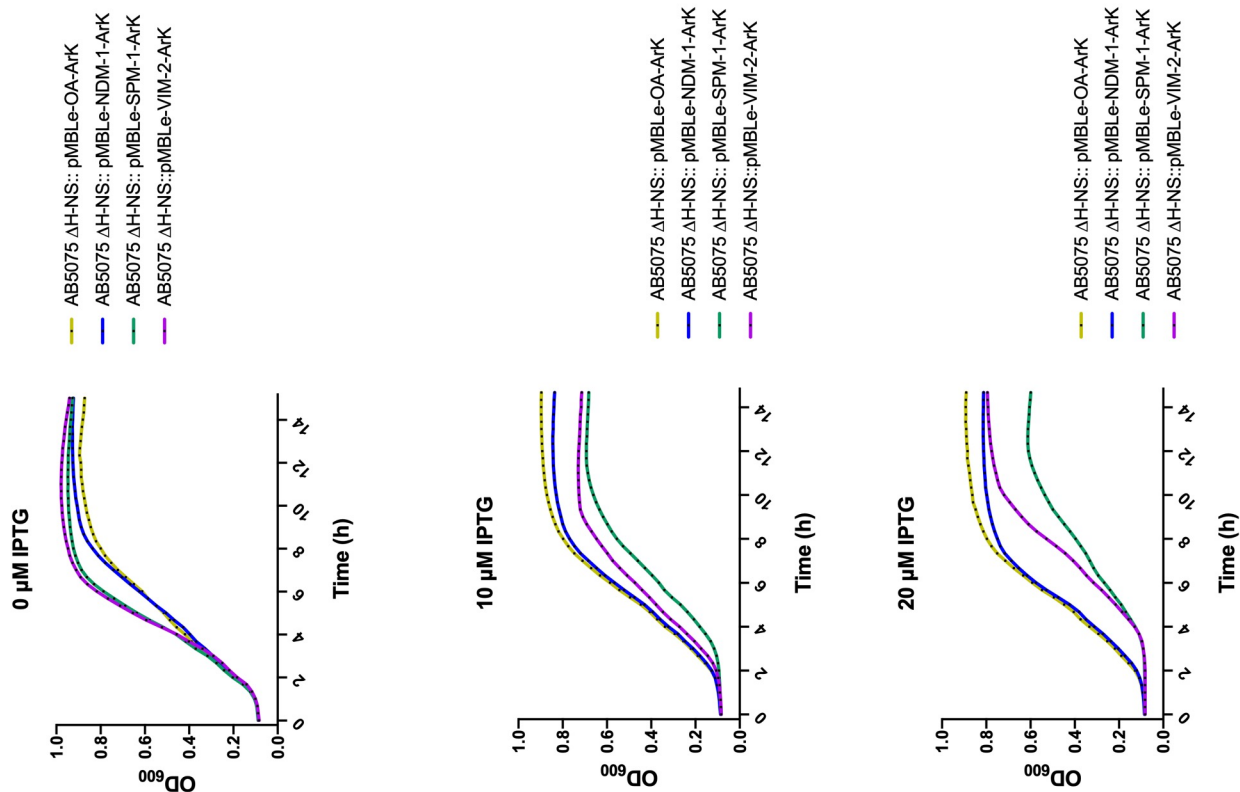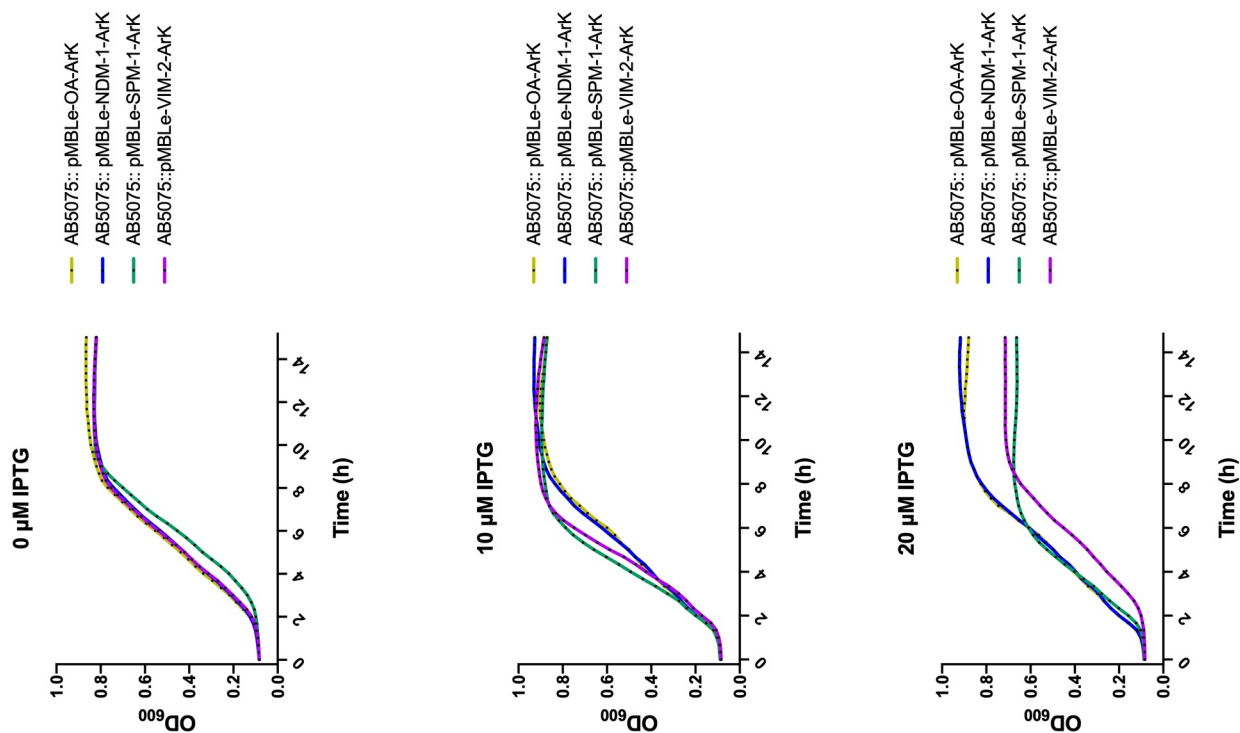

**B**

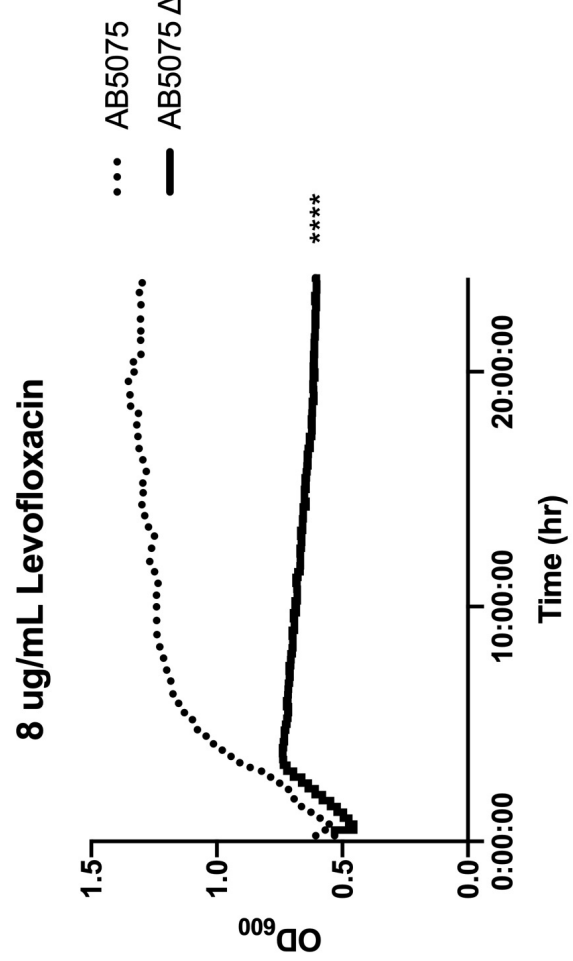

**A**

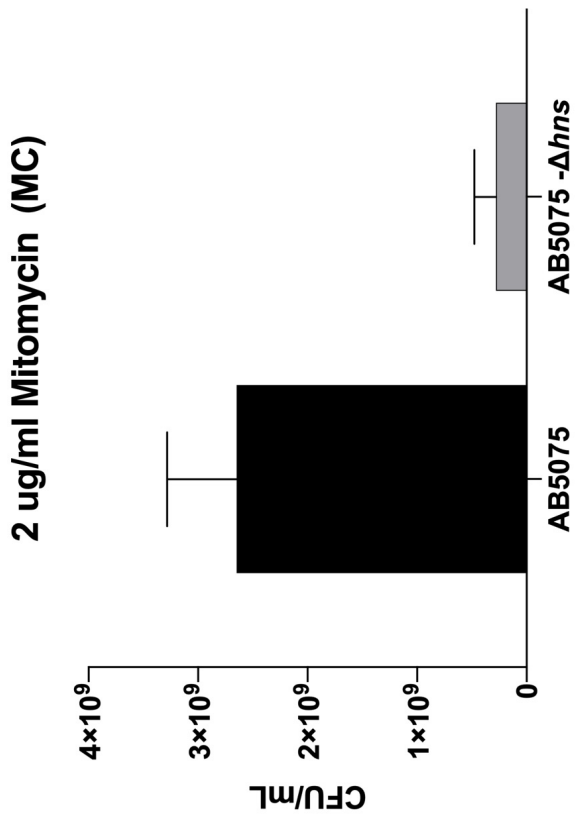

Source: https://www.biorxiv.org/content/10.1101/2020.05.18.103317v1.full.pdf
